# Supplementary material for: The role of melatonin on miRNAs modulation in triple-negative breast cancer cells
Source: PubMed Central journal article supplement (PMC6996834; doi:10.1371/journal.pone.0228062), 2020-02-03
Supplement: pone.0228062.s003.pdf [file pone.0228062.s003.pdf]

**MDA-MB-231**

| Slice                 | Count | Total Area         | Average Size | %Area  | Mean |
|-----------------------|-------|--------------------|--------------|--------|------|
| Control MDA-MB-231.   | 707   | 876616             | 1239,909     | 27,086 | 255  |
| Control MDA-MB-231.   | 664   | 904180             | 1361,717     | 27,938 | 255  |
| Control MDA-MB-231.   | 664   | 930644             | 1401,572     | 28,756 | 255  |
| Control MDA-MB-231.   | 677   | 893623             | 1319,975     | 27,612 | 255  |
| Control MDA-MB-231.   | 715   | 907435             | 1269,14      | 28,038 | 255  |
| Control MDA-MB-231.   | 657   | 960132             | 1461,388     | 29,667 | 255  |
| Control MDA-MB-231.   | 645   | 944385             | 1464,163     | 29,18  | 255  |
| Control MDA-MB-231.   | 645   | 1000472            | 1551,119     | 30,913 | 255  |
| Control MDA-MB-231.   | 727   | 925164             | 1272,578     | 28,586 | 255  |
| Control MDA-MB-231.   | 627   | 1042835            | 1663,214     | 32,222 | 255  |
|                       |       | <b>938548,6</b>    |              |        |      |
|                       |       | <b>51049,98735</b> |              |        |      |
| Melatonin MDA-MB-231. | 524   | 1024591            | 1955,326     | 31,658 | 255  |
| Melatonin MDA-MB-231. | 888   | 550604             | 620,05       | 17,013 | 255  |
| Melatonin MDA-MB-231. | 677   | 694260             | 1025,495     | 21,452 | 255  |
| Melatonin MDA-MB-231. | 614   | 778353             | 1267,676     | 24,05  | 255  |
| Melatonin MDA-MB-231. | 766   | 735503             | 960,187      | 22,726 | 255  |
| Melatonin MDA-MB-231. | 708   | 694730             | 981,257      | 21,466 | 255  |
| Melatonin MDA-MB-231. | 646   | 609569             | 943,605      | 18,835 | 255  |
| Melatonin MDA-MB-231. | 578   | 602182             | 1041,837     | 18,607 | 255  |
| Melatonin MDA-MB-231. | 712   | 613317             | 861,4        | 18,951 | 255  |
| Melatonin MDA-MB-231. | 476   | 617754             | 1297,803     | 19,088 | 255  |
|                       |       | <b>692086,3</b>    |              |        |      |
|                       |       | <b>136029,8438</b> |              |        |      |

**4175**

| Slice           | Count | Total Area         | Average Size | %Area  | Mean |
|-----------------|-------|--------------------|--------------|--------|------|
| Control 4175.   | 456   | 154458             | 338,724      | 4,773  | 255  |
| Control 4175.   | 465   | 147819             | 317,89       | 4,567  | 255  |
| Control 4175.   | 510   | 235366             | 461,502      | 7,272  | 255  |
| Control 4175.   | 612   | 273634             | 447,114      | 8,455  | 255  |
| Control 4175.   | 456   | 191532             | 420,026      | 5,918  | 255  |
| Control 4175.   | 670   | 482479             | 720,118      | 14,908 | 255  |
| Control 4175.   | 560   | 366322             | 654,146      | 11,319 | 255  |
| Control 4175.   | 657   | 430761             | 655,648      | 13,31  | 255  |
| Control 4175.   | 615   | 339302             | 551,711      | 10,484 | 255  |
| Control 4175.   | 522   | 197897             | 379,113      | 6,115  | 255  |
|                 |       | <b>281957</b>      |              |        |      |
|                 |       | <b>117610,1663</b> |              |        |      |
| Melatonin 4175. | 384   | 186729             | 486,273      | 5,77   | 255  |
| Melatonin 4175. | 323   | 126506             | 391,659      | 3,909  | 255  |
| Melatonin 4175. | 438   | 206963             | 472,518      | 6,395  | 255  |
| Melatonin 4175. | 440   | 200169             | 454,93       | 6,185  | 255  |
| Melatonin 4175. | 528   | 287669             | 544,828      | 8,889  | 255  |
| Melatonin 4175. | 465   | 224044             | 481,815      | 6,923  | 255  |

|                 |     |                    |         |       |     |
|-----------------|-----|--------------------|---------|-------|-----|
| Melatonin 4175. | 435 | 197404             | 453,802 | 6,099 | 255 |
| Melatonin 4175. | 489 | 204530             | 418,262 | 6,32  | 255 |
| Melatonin 4175. | 447 | 169682             | 379,602 | 5,243 | 255 |
| Melatonin 4175. | 470 | 179875             | 382,713 | 5,558 | 255 |
| Melatonin 4175. | 460 | 241886             | 525,839 | 7,474 | 255 |
|                 |     | <b>202314,2727</b> |         |       |     |
|                 |     | <b>39239,29654</b> |         |       |     |
