# Supplementary material for: The role of melatonin on miRNAs modulation in triple-negative breast cancer cells
Source: PubMed Central journal article supplement (PMC6996834; doi:10.1371/journal.pone.0228062), 2020-02-03
Supplement: pone.0228062.s004.pdf [file pone.0228062.s004.pdf]

**MDA-MB-231****Time 24 h**

|            |          |          |          |          |          | <b>Media</b> | <b>Desvpad</b> |
|------------|----------|----------|----------|----------|----------|--------------|----------------|
| Control    | 0,252532 | 0,230391 | 0,223905 | 0,23988  | 0,235794 | 0,2365       | 0,010781       |
| Mel 100 nM | 0,250184 | 0,238283 | 0,234518 | 0,232997 | 0,227995 | 0,236795     | 0,008345       |
| Mel 1 mM   | 0,244185 | 0,233262 | 0,248321 | 0,240942 | 0,254642 | 0,24427      | 0,008004       |

**Time 48 h**

|            |          |          |          |          |          |          |          |
|------------|----------|----------|----------|----------|----------|----------|----------|
| Control    | 0,279489 | 0,254982 | 0,246818 | 0,256852 | 0,25697  | 0,259022 | 0,012176 |
| Mel 100 nM | 0,2677   | 0,251051 | 0,252773 | 0,244487 | 0,27827  | 0,258856 | 0,01378  |
| Mel 1 mM   | 0,24307  | 0,235257 | 0,244276 | 0,238152 | 0,230342 | 0,238219 | 0,005724 |

**Time 72 h**

|            |          |          |          |          |          |          |          |
|------------|----------|----------|----------|----------|----------|----------|----------|
| Control    | 0,320931 | 0,373272 | 0,404963 | 0,347099 | 0,305134 | 0,35028  | 0,040089 |
| Mel 100 nM | 0,354903 | 0,399299 | 0,343669 | 0,369571 | 0,342321 | 0,361952 | 0,02357  |
| Mel 1 mM   | 0,273473 | 0,346117 | 0,267967 | 0,254431 | 0,237759 | 0,275949 | 0,041578 |

**Time 96 h**

|            |          |          |          |          |          |          |          |
|------------|----------|----------|----------|----------|----------|----------|----------|
| Control    | 0,654295 | 0,697524 | 0,581095 | 0,710089 | 0,714567 | 0,671514 | 0,05588  |
| Mel 100 nM | 0,748301 | 0,658195 | 0,651949 | 0,642613 | 0,781641 | 0,69654  | 0,063812 |
| Mel 1 mM   | 0,439575 | 0,368676 | 0,424932 | 0,412159 | 0,358538 | 0,400776 | 0,035472 |

**Time 120 h**

|            |          |          |          |          |          |          |          |
|------------|----------|----------|----------|----------|----------|----------|----------|
| Control    | 0,557794 | 0,496993 | 0,554987 | 0,488547 | 0,590147 | 0,537693 | 0,043377 |
| Mel 100 nM | 0,615877 | 0,511503 | 0,448793 | 0,476473 | 0,633968 | 0,537323 | 0,083243 |
| Mel 1 mM   | 0,356601 | 0,393396 | 0,393585 | 0,355704 | 0,385726 | 0,377002 | 0,019298 |

**MCF-7****Time 24 h**

|            |          |          |          |          |          | <b>Media</b> | <b>Desvpad</b> |
|------------|----------|----------|----------|----------|----------|--------------|----------------|
| Control    | 0,297978 | 0,340411 | 0,303666 | 0,30664  | 0,322115 | 0,314162     | 0,017182       |
| Mel 100 nM | 0,345945 | 0,276896 | 0,303383 | 0,294921 | 0,284558 | 0,301141     | 0,02699        |
| Mel 1 mM   | 0,314422 | 0,311542 | 0,278224 | 0,28755  | 0,283046 | 0,294957     | 0,016813       |

**Time 48 h**

|            |          |          |          |          |          |          |          |
|------------|----------|----------|----------|----------|----------|----------|----------|
| Control    | 0,320938 | 0,307574 | 0,320303 | 0,286111 | 0,304779 | 0,307941 | 0,014216 |
| Mel 100 nM | 0,274141 | 0,327356 | 0,27078  | 0,291616 | 0,284148 | 0,289608 | 0,022652 |
| Mel 1 mM   | 0,268456 | 0,255496 | 0,252496 | 0,261336 | 0,270632 | 0,261683 | 0,007886 |

**Time 72 h**

|            |          |          |          |          |          |          |          |
|------------|----------|----------|----------|----------|----------|----------|----------|
| Control    | 0,378799 | 0,344521 | 0,350261 | 0,370702 | 0,379445 | 0,364746 | 0,016339 |
| Mel 100 nM | 0,378237 | 0,371771 | 0,377108 | 0,358003 | 0,353278 | 0,367679 | 0,011381 |
| Mel 1 mM   | 0,321358 | 0,330311 | 0,309911 | 0,33524  | 0,290207 | 0,317405 | 0,018001 |

**Time 96 h**

|            |          |          |          |          |          |          |          |
|------------|----------|----------|----------|----------|----------|----------|----------|
| Control    | 0,488483 | 0,521883 | 0,513411 | 0,554295 | 0,562806 | 0,528176 | 0,030473 |
| Mel 100 nM | 0,468925 | 0,435001 | 0,512973 | 0,506463 | 0,478914 | 0,480455 | 0,031365 |
| Mel 1 mM   | 0,411792 | 0,381019 | 0,416584 | 0,393635 | 0,382699 | 0,397146 | 0,016382 |

**Time 120 h**

|            |          |          |          |          |          |          |          |
|------------|----------|----------|----------|----------|----------|----------|----------|
| Control    | 0,821675 | 0,846892 | 0,813841 | 1,007182 | 0,731121 | 0,844142 | 0,100978 |
| Mel 100 nM | 0,864908 | 0,802889 | 1,015571 | 0,801718 | 0,772613 | 0,85154  | 0,097677 |
| Mel 1 mM   | 0,435078 | 0,487404 | 0,506652 | 0,517062 | 0,424881 | 0,474215 | 0,041915 |
