# Supplementary material for: The role of melatonin on miRNAs modulation in triple-negative breast cancer cells
Source: PubMed Central journal article supplement (PMC6996834; doi:10.1371/journal.pone.0228062), 2020-02-03
Supplement: pone.0228062.s005.pdf [file pone.0228062.s005.pdf]

**MDA-MB-231 - 24 hs****c-myc**

| <u>Sample</u> | <u>mean</u> | <u>mean -blank</u> | <u>average</u> | <u>ratio</u> |            |                 |
|---------------|-------------|--------------------|----------------|--------------|------------|-----------------|
| Control       | 16086,685   | 13556,435          | 10972,5295     | 3,73705364   | 1          | <b>100</b>      |
| Control       | 10918,874   | 8388,624           |                |              |            |                 |
| Mel           | 9726,118    | 7195,868           | 6343,338       | 1,89816639   | 0,50793127 | <b>50,79313</b> |
| Mel           | 8021,058    | 5490,808           |                |              |            |                 |
| background    | 2530,25     |                    |                |              |            |                 |

**HSP90**

| <u>Sample</u> | <u>mean</u> | <u>mean -blank</u> | <u>average</u> |
|---------------|-------------|--------------------|----------------|
| Control       | 4660,977    | 3041,502           | 2936,1445      |
| Control       | 4450,262    | 2830,787           |                |
| Mel           | 4936,814    | 3317,339           | 3341,824       |
| Mel           | 4985,784    | 3366,309           |                |
| background    | 1619,475    |                    |                |

**MDA-MB-231 - 72 hrs****c-myc**

| <u>Sample</u> | <u>mean</u> | <u>mean -blank</u> | <u>average</u> | <u>ratio</u> |            |                 |
|---------------|-------------|--------------------|----------------|--------------|------------|-----------------|
| Control       | 4391,593    | 3056,635           | 3237,275       | 0,61440814   | 1          | <b>100</b>      |
| Control       | 4752,873    | 3417,915           |                |              |            |                 |
| Mel           | 1545,277    | 210,319            | 213,35         | 0,06198523   | 0,10088608 | <b>10,08861</b> |
| Mel           | 1551,339    | 216,381            |                |              |            |                 |
| background    | 1334,958    |                    |                |              |            |                 |

**HSP90**

| <u>Sample</u> | <u>mean</u> | <u>mean -blank</u> | <u>average</u> |
|---------------|-------------|--------------------|----------------|
| Control       | 9271,63     | 5125,431           | 5268,9325      |
| Control       | 9558,633    | 5412,434           |                |
| Mel           | 7223,483    | 3077,284           | 3441,949       |
| Mel           | 7952,813    | 3806,614           |                |
| background    | 4146,199    |                    |                |

**MCF-7 - 24 hrs****C-myc**

| <u>Sample</u> | <u>mean</u> | <u>mean -blank</u> | <u>average</u> | <u>ratio</u> |            |                |
|---------------|-------------|--------------------|----------------|--------------|------------|----------------|
| Control       | 14029,912   | 9269,625           | 9711,513       | 2,5743958    | 1          | <b>100</b>     |
| Control       | 14913,688   | 10153,401          |                |              |            |                |
| Mel           | 15778,402   | 11018,115          | 10468,486      | 2,24977488   | 0,87390404 | <b>87,3904</b> |

Mel 14679,144 9918,857

background 4760,287

### HSP90

| <u>Sample</u> | <u>mean</u> | <u>mean -blank</u> | <u>average</u> |
|---------------|-------------|--------------------|----------------|
| Control       | 5497,217    | 1570,233           | 3772,3465      |
| Control       | 9901,444    | 5974,46            |                |
| Mel           | 9108,92     | 5181,936           | 4653,126       |
| Mel           | 8051,3      | 4124,316           |                |

background 3926,984

### MCF-7 - 72 h

#### C-myc

| <u>Sample</u> | <u>mean</u> | <u>mean -blank</u> | <u>average</u> | <u>ratio</u> |            |         |
|---------------|-------------|--------------------|----------------|--------------|------------|---------|
| Control       | 8785,304    | 6783,212           | 6615,903       | 1,65810588   | 1          | 100     |
| Control       | 8450,686    | 6448,594           |                |              |            |         |
| Mel           | 6262,831    | 4260,739           | 3790,877       | 0,94905671   | 0,57237401 | 57,2374 |
| Mel           | 5323,107    | 3321,015           |                |              |            |         |

background 2002,092

### HSP90

| <u>Sample</u> | <u>mean</u> | <u>mean -blank</u> | <u>average</u> |
|---------------|-------------|--------------------|----------------|
| Control       | 5457,161    | 4221,025           | 3990,0365      |
| Control       | 4995,184    | 3759,048           |                |
| Mel           | 5098,464    | 3862,328           | 3994,363       |
| Mel           | 5362,534    | 4126,398           |                |

background 1236,136

### Anti-miR-210

#### c-myc

| <u>Sample</u>      | <u>mean</u> | <u>mean -blank</u> | <u>ratio</u> |             |            |
|--------------------|-------------|--------------------|--------------|-------------|------------|
| Neg. Control       | 7109,275    | 5158,233           | 2638,933     | 1           | 100        |
| Neg. Control + Mel | 2892,325    | 941,283            | -1261,316    | -0,47796439 | -47,796439 |
| Anti-miR-210       | 4881,182    | 2930,14            | 620,252      | 0,23503893  | 23,5038934 |
| Anti-miR-210 + Mel | 4420,295    | 2469,253           | -303,804     | -0,1151238  | -11,51238  |

background 1951,042

### HSP90

| <u>Sample</u>      | <u>mean</u> | <u>mean -blank</u> |
|--------------------|-------------|--------------------|
| Neg. Control       | 3363,601    | 2519,3             |
| Neg. Control + Mel | 3046,9      | 2202,599           |
| Anti-miR-210       | 3154,189    | 2309,888           |

Anti-miR-210 + Mel 3617,358 2773,057

background 844,301

### pLent-Empty

#### c-myc

| <u>Sample</u> | <u>mean</u> | <u>mean -blank</u> | <u>average</u> | <u>ratio</u> |            |         |
|---------------|-------------|--------------------|----------------|--------------|------------|---------|
| Control       | 10273,656   | 7681,179           | 6371,7705      | 1,70104579   | 1          | 100     |
| Control       | 7654,839    | 5062,362           |                |              |            |         |
| Mel           | 5439,927    | 2847,45            | 2672,1975      | 0,82741075   | 0,48641298 | 48,6413 |
| Mel           | 5089,422    | 2496,945           |                |              |            |         |

background 2592,477

#### HSP90

| <u>Sample</u> | <u>mean</u> | <u>mean -blank</u> | <u>average</u> |
|---------------|-------------|--------------------|----------------|
| Control       | 13912,608   | 4830,458           | 3745,796       |
| Control       | 11743,284   | 2661,134           |                |
| Mel           | 12902,609   | 3820,459           | 3229,59        |
| Mel           | 11720,871   | 2638,721           |                |

background 9082,15

### miR-148b sponge

| <u>Sample</u> | <u>mean</u> | <u>mean -blank</u> | <u>average</u> | <u>ratio</u> |            |          |
|---------------|-------------|--------------------|----------------|--------------|------------|----------|
| Control       | 8347,757    | 5354,685           | 5600,081       | 2,32690846   | 1          | 100      |
| Control       | 8838,549    | 5845,477           |                |              |            |          |
| Mel           | 4725,903    | 1732,831           | 1732,831       | 1,18369969   | 0,50870058 | 50,87006 |
| Mel           | --          |                    |                |              |            |          |

background 2993,072

#### HSP90

| <u>Sample</u> | <u>mean</u> | <u>mean -blank</u> | <u>average</u> |
|---------------|-------------|--------------------|----------------|
| Control       | 8089,007    | 2810,405           | 2406,6615      |
| Control       | 7281,52     | 2002,918           |                |
| Mel           | 7083,457    | 1804,855           | 1463,911       |
| Mel           | 6401,569    | 1122,967           |                |

background 5278,602
