# Supplementary material for: The role of melatonin on miRNAs modulation in triple-negative breast cancer cells
Source: PubMed Central journal article supplement (PMC6996834; doi:10.1371/journal.pone.0228062), 2020-02-03
Supplement: pone.0228062.s007.pdf [file pone.0228062.s007.pdf]

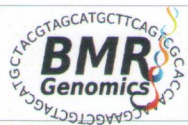**BMR Genomics srl**Rev. 1,1  
13/05/2015**Certificato di analisi**

pagina 1 di 2

Prenotazione di riferimento Nr. 128272

Data di emissione 29/10/2015

Alla c.a. Della Dr.ssa Fiorella Balzac  
Login: torino  
Ente: Università degli Studi di Torino  
e-mail: fiorella.balzac@unito.it  
Telefono: 0116706419

## Fasi dell'Analisi

### Fase1: Amplificazione

Amplificazione del materiale inviato mediante il kit PowerPlex Fusion System secondo le specifiche del produttore.

La reazione di amplificazione è stata effettuata su termociclatore Eppendorf Mastercycler.

### Fase2: Elettroforesi ed analisi

Corsa elettroforetica su sequenziatore capillare "Applied Biosystems 3130XL":

- Fascio da 16 capillari (36cm)
- Polimero di corsa POP7
- Software di gestione strumento: Data Collection Software Ver. 3.0
- Software di analisi: Genemapper ID Ver. 3.2.1

## Risultati dell'analisi

L'esito della corsa elettroforetica sui 24 marcatori genetici del kit PowerPlex Fusion System ha prodotto i seguenti profili genetici:

| Marcatori | A837-4175n | A838-ma2 | A839-t47d | A840-hbl100 |
|-----------|------------|----------|-----------|-------------|
| AMEL      | X          | X        | X         | X           |
| D3S1358   | 16         | 15-17    | 15-17     | 14-16       |
| D1S1656   | 15-17      | 16-17.3  | 15-16     | 12-16.3     |
| D2S441    | 14-15      | 11       | 14        | 11          |
| D10S1248  | 16         | 15-16    | 17        | 13          |
| D13S317   | 13         | 11-14    | 12        | 12          |
| Penta E   | 11         | 10-12    | 7-14      | 7           |
| D16S539   | 12         | 9        | 10        | 9-12        |
| D18S51    | 16         | 12-17    | 17        | 16          |
| D2S1338   | 20-21      | 16-24    | 24        | 18-24       |
| CSF1PO    | 12-13      | 11-12    | 11-13     | 10          |
| Penta D   | 11-14      | 9-15     | 10-12     | 12          |
| TH01      | 7-9.3      | 8        | 6         | 6-8         |
| vWA       | 15-18      | 16-17    | 14        | 16          |
| D21S11    | 30-33.2    | 29-30    | 28-31     | 28          |
| D7S820    | 8          | 9        | 11        | 8-12        |
| D5S818    | 12         | 12       | 12        | 11-12       |
| TPOX      | 8-9        | 8-10     | 11        | 8           |
| DYS391    | -          | -        | -         | -           |
| D8S1179   | 13         | 11-14    | 13        | 12-15       |
| D12S391   | 17-18      | 18-21    | 19        | 18          |

|                                                                                   |                               |  |                              |                        |
|-----------------------------------------------------------------------------------|-------------------------------|--|------------------------------|------------------------|
|  | <b>BMR Genomics srl</b>       |  |                              | Rev. 1,1<br>13/05/2015 |
|                                                                                   | <b>Certificato di analisi</b> |  |                              | pagina 2 di 2          |
| Prenotazione di riferimento Nr. 128272                                            |                               |  | Data di emissione 29/10/2015 |                        |

|                 |       |         |    |       |
|-----------------|-------|---------|----|-------|
| <b>D19S433</b>  | 11-14 | 13-14.2 | 14 | 15    |
| <b>FGA</b>      | 22-23 | 20-23   | 23 | 25 ✓  |
| <b>D22S1045</b> | 16    | 16      | 15 | 15-16 |

**Nomenclatura:**

(n): picchi deboli o stutter particolarmente intensi

Operatore che ha effettuato l'analisi

*Giorgia Bovo*

**Note:**

Il certificato si riferisce ai risultati ottenuti dai campioni forniti dall'utente, costituiti da DNA genomici, sottoposti ad analisi.

**AZIENDA CON SISTEMA  
DI GESTIONE QUALITÀ  
CERTIFICATO DA DNV GL  
= ISO 9001 =**
