# Supplementary material for: The role of melatonin on miRNAs modulation in triple-negative breast cancer cells
Source: PubMed Central journal article supplement (PMC6996834; doi:10.1371/journal.pone.0228062), 2020-02-03
Supplement: pone.0228062.s008.pdf [file pone.0228062.s008.pdf]

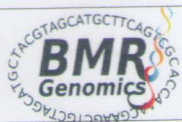**BMR Genomics srl**Rev. 1  
30/09/2011**Certificato di analisi**

pagina 1 di 2

Prenotazione di riferimento Nr. 97112 PS678

Data di emissione 07/05/2012

Alla c.a. Francesca Orso, PhD  
Molecular Biotechnology Center Dept.  
Oncological Sciences  
University of Turin Via Nizza, 52  
10126 Torino  
Italy  
login: torino  
Phone: +39 011 670 6448  
Fax: +39 011 670 6432  
e-mail: francesca.orso@unito.it

## Fasi dell'Analisi

### Fase1: Amplificazione

Amplificazione del materiale inviato mediante il kit Cell ID<sup>(tm)</sup> System secondo le specifiche del produttore. La reazione di amplificazione è stata effettuata su termociclatore Applied Biosystems "GeneAmp PCR System 9700".

### Fase2: Elettroforesi ed analisi

Corsa elettroforetica su sequenziatore capillare "Applied biosystems 3130XL":

- Fascio da 16 capillari (36cm)
- Polimero di corsa POP7
- Software di gestione strumento: Data Collection Software Ver. 3.0
- Software di analisi: Genemapper ID Ver. 3.2.1

## Risultati dell'analisi

L'esito della corsa elettroforetica sui 10 marcatori genetici del kit Cell ID<sup>(tm)</sup> System ha prodotto i seguenti profili genetici:

### Nomenclatura:

(n) = Picco debole o picco stutter molto intenso

Difficile Interpretazione

| Marcatore | 792A-MDAMB231 |   |
|-----------|---------------|---|
| TH01      | 7-9.3         | ✓ |
| D21S11    | 33.2          |   |
| D5S818    | 12            | ✓ |
| D13S317   | 13            | ✓ |
| D7S820    | 8-9           | ✓ |
| D16S539   | 12            | ✓ |
| CSF1PO    | 12-13         | ✓ |
| AMEL      | X             | ✓ |
| vWA       | 15-18         | ✓ |
| TPOX      | 8-9           | ✓ |

### Note e Commenti:

|                                                                                   |                               |                              |
|-----------------------------------------------------------------------------------|-------------------------------|------------------------------|
|  | <b>BMR Genomics srl</b>       | Rev. 1<br>30/09/2011         |
|                                                                                   | <b>Certificato di analisi</b> | pagina 2 di 2                |
| Prenotazione di riferimento Nr. 97112 PS678                                       |                               | Data di emissione 07/05/2012 |

Operatore che ha effettuato l'analisi

*Giorgio Malucchi*

**Note:**

Il certificato si riferisce ai risultati ottenuti dai campioni forniti dall'utente, costituiti da DNA genomici, sottoposti ad analisi.

[Print this Page](#)

**Cell Biology**

|                                   |                 |                  |                                    |                  |
|-----------------------------------|-----------------|------------------|------------------------------------|------------------|
| ATCC® Number:                     | HTB-28™         | Original Source: | Price:                             | €358.00; €498.00 |
| Designation:                      | MDA-MB-231      |                  | Related Lists:                     |                  |
| Species:                          | Human           |                  | W33 Error Search                   |                  |
| Stock Qty (1 x 10 <sup>6</sup> ): | 1               |                  | Cell Monograph                     |                  |
| Shipping:                         | Room            |                  | Media & Devices                    |                  |
| Medium & Serum:                   | See Description |                  | Frequently Asked Questions         |                  |
| Growth Properties:                | adherent        |                  | Historical Transfer Agreement News |                  |
| Sex:                              | female          |                  | Technical Support                  |                  |
| Morphology:                       | epithelial      |                  | Related Cell Culture Products      |                  |

**Species:** Human  
**Origin:** Epithelial primary gland, breast  
**Characterization:** Epithelial adenocarcinoma  
 Derived from metastatic site pleural effusion  
**Cell Type:** epithelial  
**Remarks:** In addition to the MDA mentioned above, other ATCC epithelial regulatory proteins may be useful for the transfer of this ATCC material. Accurate purchasing ATCC material is ultimately responsible for ensuring the identity. Please visit [http://www.atcc.org](#) for information regarding the specific requirements for shipment to your location.  
**Applications:** [View applications here](#)

**Receptor:** epidermal growth factor (EGF), expressed  
**Transcripts:** transforming growth factor alpha (TGF-α), expressed  
**DNA Probe (STR):** Amplicum 5  
 CDH1P: 12.63  
 D17S11: 12  
 D16S10: 14  
 D5S11: 12  
 TPOX: 8.9  
 TH01: 7.9-3  
 TPOX: 8.9  
 VWA: 15.10

**Cytogenetic Analysis:** The cell line is aneuploid female (modal number = 44, range = 52 to 68), with chromosome counts in the near-tetraploid range. Normal chromosomes 10 and 11 are absent. Eleven stable rearranged nuclear chromosomes are noted as well as unassignable chromosomes in addition to the majority of autosomes that are tetraploid. Many of the marker chromosomes are identical to those shown in the karyotype reported by S.C. Gore-Petesch, et al.

**Genes:** AK-1, 1  
 ERG, 2  
 GDF3, 3  
 G2E1, 2  
 Hs-2, 2-2  
 PGM1, 1-2  
 PGM1, 1  
**Age:** 51 years adult  
**Sex:** female  
**Race:** Caucasian  
**Comments:** The cells express the WNT7B oncogene (PubMed: 8100088).
